# Supplementary material for: Enhancing dye-sensitized solar cell efficiency through broadband near-infrared upconverting nanoparticles
Source: Royal Society of Chemistry journal article supplement (doi:10.1039/c7nr01008g), 2017-01-01
Supplement: c7nr01008g1.pdf [file c7nr01008g1.pdf]

Electronic Supplementary Material (ESI) for Nanoscale.

This journal is © The Royal Society of Chemistry 2015

## Supporting Information

### Enhancing Dye-Sensitized Solar Cell Efficiency through Broadband Near-Infrared Upconverting Nanoparticles

Shuwei Hao<sup>a†1</sup> Yunfei Shang<sup>a‡</sup>, Deyang Li<sup>a</sup>, Hans Ågren<sup>b</sup>, Chunhui Yang<sup>\*a,c</sup>, and Guanying Chen<sup>\*a</sup>

<sup>a</sup>MIIT Key Laboratory of Critical Materials Technology for New Energy Conversion and Storage, School of Chemistry and Chemical Engineering & Key Laboratory of Micro-systems and Micro-structures, Ministry of Education, Harbin Institute of Technology, 150001 Harbin, People's Republic of China.

<sup>b</sup>Department of Theoretical Chemistry&Biology, Royal Institute of Technology, S-10691 Stockholm, Sweden

<sup>c</sup>State Key Laboratory of Urban Water Resource and Environment, Harbin Institute of Technology

<sup>†</sup>Equal contribution

\*Corresponding Emails: [chenguanying@hit.edu.cn](mailto:chenguanying@hit.edu.cn); [yangchh@hit.edu.cn](mailto:yangchh@hit.edu.cn)

## Experimental Procedures: materials, synthesis and characterization

**Materials.** All chemicals were of analytical grade and used without further purification.  $\text{YCl}_3 \cdot 6\text{H}_2\text{O}$  (99.99%),  $\text{YbCl}_3 \cdot 6\text{H}_2\text{O}$  (99.99%),  $\text{ErCl}_3 \cdot 6\text{H}_2\text{O}$  (99.99%),  $\text{NdCl}_3 \cdot 6\text{H}_2\text{O}$  (99.99%) were supplied by Beijing Founde Star Science and Technology Co., Ltd China.  $\text{NaOH}$  (98%),  $\text{NH}_4\text{F}$  (98%), Hexane (99.9%), 1-octadecene (ODE, 90%) and oleic acid (OA, 90%) nitrosonium tetrafluoroborate ( $\text{NOBF}_4$ , 95%),  $\text{N,N}$ -dimethylformamide (DMF, anhydrous, 99.8%), were obtained from Sigma Aldrich. Chloroplatinic acid hexahydrate ( $\text{H}_2\text{PtCl}_6$ , ACS reagent), ethanol (ACS reagent, absolute), ethyl cellulose (EC), terpineol, N719 dye and IR-783 dye were purchased from the Aladdin. Fluorine-doped tin oxide (FTO) conducting glass plates (sheet resistance  $10 \Omega \text{ sq}^{-1}$ ) and  $\text{P}_{25}$  ( $\text{TiO}_2$ ) were purchased from Qiseguang Technology Ltd. in China.

**Synthesis of  $\text{NaYF}_4\text{:10\%Yb}^{3+}\text{,2\%Er}^{3+}$  core nanoparticles.** The core nanoparticles codoped with 2 mol%  $\text{Er}^{3+}$  and 10 mol%  $\text{Yb}^{3+}$  were synthesized using a solvothermal method adapted from our recent work. A typical procedure is as follows: a 100 mL three-necked flask containing 6 mL oleic acid (OA) and 15 mL 1-octadecene (ODE) were added given amounts of  $\text{YCl}_3 \cdot 6\text{H}_2\text{O}$  (0.78 mmol),  $\text{YbCl}_3 \cdot 6\text{H}_2\text{O}$  (0.2 mmol) and  $\text{ErCl}_3 \cdot 6\text{H}_2\text{O}$  (0.02 mmol). The mixture was heated to  $120^\circ\text{C}$  to form a pellucid solution and remove residual water and oxygen, and then cooled down to room temperature. 10 mL of methanol solution containing  $\text{NaOH}$  (2.5 mmol) and  $\text{NH}_4\text{F}$  (4 mmol) was slowly dropped into the flask and stirred for 30 min to ensure that all fluoride was completely consumed. Then the solution was heated to  $70\text{--}80^\circ\text{C}$  for evaporating methanol completely from the reaction mixture. Subsequently, the solution was heated to  $300^\circ\text{C}$  at a rate of about  $18^\circ\text{C/min}$ , and then maintained for 1 h under argon atmosphere. After cooling down to room temperature, the resulting products were precipitated by ethanol and collected by centrifugation at 5000 rpm for 5 min. The precipitate was then purified with ethanol three times, and finally dispersed in 10ml Hexane for further uses.

**Synthesis of  $\text{NaYF}_4\text{:10\%Yb}^{3+}\text{,2\%Er}^{3+}\text{@NaYF}_4\text{:X\%Nd}^{3+}$  core@shell nanoparticles.** In a typical experiment, a 100 mL three-necked flask containing 6 mL oleic acid (OA) and 15 mL 1-octadecene (ODE) were added given amounts of  $\text{NdCl}_3 \cdot 6\text{H}_2\text{O}$  ( $(\text{X}/2 \text{ mmol})$   $\text{X}=5,10,20,30,40$ ) and  $\text{YCl}_3 \cdot 6\text{H}_2\text{O}$  ( $(0.5\text{-X}/2 \text{ mmol})$ ) and the  $\text{NaYF}_4\text{:10\%Yb}^{3+}\text{,2\%Er}^{3+}$  core NCs (0.5 mmol) in Hexane were added. The mixture was heated to  $120^\circ\text{C}$  to form a pellucid solution and remove residual water and oxygen, and then cooled down to room temperature. 5 mL of methanol solution containing  $\text{NaOH}$  (1.25 mmol) and  $\text{NH}_4\text{F}$  (2 mmol) was slowly dropped into the flask and stirred for 30 min to ensure that all fluoride was completely consumed. Then the solution was heated to  $70\text{--}80^\circ\text{C}$  for evaporating methanol completely from the reaction mixture. Subsequently, the solution was heated to  $300^\circ\text{C}$  at a rate of about  $18^\circ\text{C/min}$ , and then maintained for 1 h under argon atmosphere. After cooling down to room temperature, the resulting products were precipitated by ethanol and collected by centrifugation at 5000 rpm for

5 min. The precipitate was then purified with ethanol three times, and finally dispersed in Hexane for further measurement.

**Preparation of NOBF<sub>4</sub> coated lanthanide-doped nanoparticles.** The oleic acid ligands on the surface of these lanthanide-doped NaYF<sub>4</sub>:10%Yb<sup>3+</sup>,2%Er<sup>3+</sup>@NaYF<sub>4</sub>:X%Nd<sup>3+</sup> nanoparticles were first replaced with sub-nanometer ligands of nitrosonium tetrafluoroborate (NOBF<sub>4</sub>) using an adapted procedure from literature<sup>S1</sup>. During this ligand exchange process, 5 mL of oleic acid coated nanoparticles dispersed in hexane (10 mg/mL) was mixed with a 5 mL N,N-dimethylformamide (DMF) solution of NOBF<sub>4</sub> (0.01 M) at room temperature. The resulting mixture was shaken gently for 10 minutes, allowing an extraction of nanoparticles from upper hexane layer into the bottom DMF layer. After disposing the hexane layer, these nanoparticles dispersed in the DMF were purified by adding a large amount of toluene and hexane (1:1 v/v) and centrifugation at 10000 rpm for 20 minutes. Subsequently, the precipitated nanoparticles were weighted and re-dispersed in DMF (for NIR dye-sensitized experiments in solution). All nanoparticle solutions were stored at room temperature.

**Preparation of IR783 dye solution in DMF.** The IR783 dye were weighed and dissolved in DMF to produce a concentration of 1 mg/mL. After that, the bottled dye solution was purged with gentle argon gas flow and sealed with a parafilm. The dye solution was then covered with aluminum foil and stored in darkness to avoid light induced degradation.

**Preparation of IR783 dye-sensitized nanoparticles solution in DMF.** NaYF<sub>4</sub>:10%Yb<sup>3+</sup>,2%Er<sup>3+</sup>@NaYF<sub>4</sub>:X%Nd<sup>3+</sup> nanoparticles solution dispersed in DMF was mixed with an appropriate amount IR783 dye solution (1 mg/mL) to produce a defined amount NIR dye concentration in the mixture.

**Fabrication of DSSC devices.** Transparent fluorine-doped tin oxide (FTO) glass was used as substrate. FTO was sequentially cleaned in absolute ethanol, and deionized (DI) water for 15 min under ultrasonic treatment. After cleaning and drying of FTO, the cleaned FTO was dried at 80 °C for further use. 1.00 g EC powder was then dissolved in 50 ml absolute ethanol, and mixed with 2.0g P<sub>25</sub> (TiO<sub>2</sub>) nanoparticles suspension, followed by sonication for 1 h at 60 °C. Terpeneol (8.69 ml) was added dropwise into the as-prepared mixture. Subsequently, the ethanol in the mixture was removed on a rotary evaporator at 65 °C for 2 hours. Then, the TiO<sub>2</sub> films were screen-printed on FTO substrate, followed by being sintered at 450 °C for 1 h and 500 °C for 15 min in nitrogen. The sintered film was posttreated in a fresh aqueous TiCl<sub>4</sub> solution (30 mM) at 70 °C for 30 min. Then, the TiO<sub>2</sub> film treated by TiCl<sub>4</sub> was sintered at 500 °C for 30 min. After cooling down to 80 °C, the sintered photoanodes were immersed in 0.5 mM N719 dye in acetonitrile/tert-butanol mixed solution (1:1, v/v) for 24 h. The platinized counter electrodes were prepared by thermal deposition of H<sub>2</sub>PtCl<sub>6</sub> solution (5 M in isopropanol) onto FTO glass at 400 °C for 30 min. IR783 dye-sensitized UCNPs were deposited onto the dye sensitized films simply by immersing the films into IR783 dye-sensitized UCNPs solution (0.01 M) in hexane for 5, 10, 20 or 30 min, following by washing with hexane solution. All the immersion and washing processes were carried out

under room temperature. A platinized FTO glass was used as counter electrode. TiO<sub>2</sub> films and counter electrode were sealed with a 25µm thick Surlyn at 120°C. There is a predrilled hole in the counter electrode, where electrolyte was introduced into the solar cells. The hole was finally sealed with a Surlyn and a thin glass. Under each condition, at least three samples were prepared for the measurements in order to obtain a medium value as the final data.

### **Characterization.**

**Transmission Electron Microscopy.** The morphology and size of the resulting nanoparticles were investigated by means of transmission electron microscope (TEM, Tecnai G2 Spirit Twin 12) operating at 80 kV. High resolution transmission electron microscopic (HRTEM) images were obtained on the microscope of Spirit Twin Tecnai G2 D339 operating at 300 kV. One drop of diluted colloidal NaYF<sub>4</sub> solution dispersed in cyclohexane was allowed to be dried on the surface of the carbon-coated copper grid.

**X-ray Diffraction.** The powder X-Ray diffraction (XRD) pattern was carried out on a Rigaku D/max-γB diffractometer equipped with a rotating anode and a Cu Kα source ( $\lambda=0.15418$  nm). The  $2\theta$  angle of the XRD spectra was recorded at a scanning rate of 5 °/min from 20° to 80°.

**Absorption and luminescence.** Absorption spectra of IR dyes, colloidal core/shell nanoparticles, as well as IR dye-sensitized core/shell nanoparticles dispersed in DMF were acquired using a Shimadzu 3600 UV–Visible-NIR spectrophotometer. The upconversion luminescence spectra (UCL) were recorded using a Fluorolog-3.11 Jobin Yvon spectrofluorometer. The UCL signal of the sample in the cuvette was collected at 90° relative to the excitation light. Near infrared (NIR). All luminescence spectra have been corrected for the spectral sensitivity of the spectroscopy system using the Fluorolog spectrofluorometer calibration curve (for UCL).

**Current density-voltage (I-V) and IPCE characteristics.** The current density–voltage(I–V) characteristics were measured by using a sun simulator (Oriel, AM 1.5G illumination at 100 mW/cm<sup>2</sup>) and a computerized Keithley 2400 source meter with a voltage step of 25mV at room temperature. A black mask (6 × 6 mm) was used in the subsequent photovoltaic studies. The incident photon to current efficiency (IPCE) spectra were measured using a tungstenhalogen light source combined with a monochromator (Spectra Pro 2300, Acton Research), and a lock-in amplifier (SR-830, Stanford Research) by locking to the modulation frequency.

## Supporting Figures

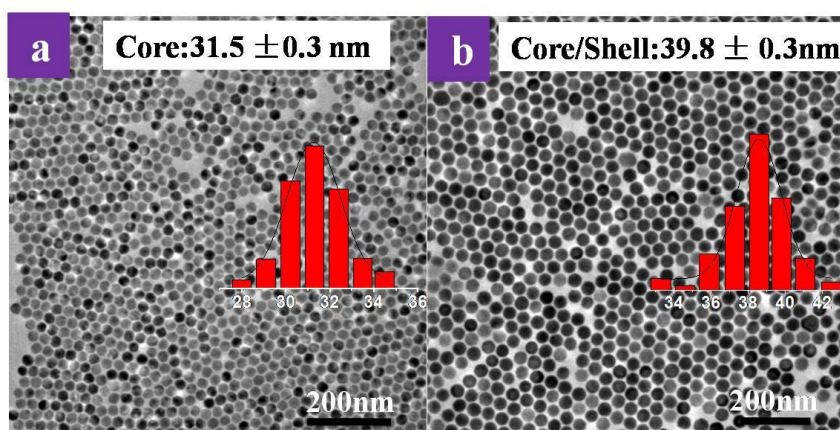

**Figure S1.** Transmission electron microscopy (TEM) images of (a) the core NaYF<sub>4</sub>:10%Yb,2%Er, (b) the core/shell NaYF<sub>4</sub>:10%Yb,2%Er@NaYF<sub>4</sub>:30%Nd core/shell nanoparticles. The TEM results indicate the resulting NaYF<sub>4</sub>:10%Yb,2%Er core and NaYF<sub>4</sub>:10%Yb,2%Er@NaYF<sub>4</sub>:30%Nd core/shell nanoparticles have an average size of ~ 31.5 nm and ~ 38.5 nm, implying that a shell layer of 7nm is successfully coated on the core.

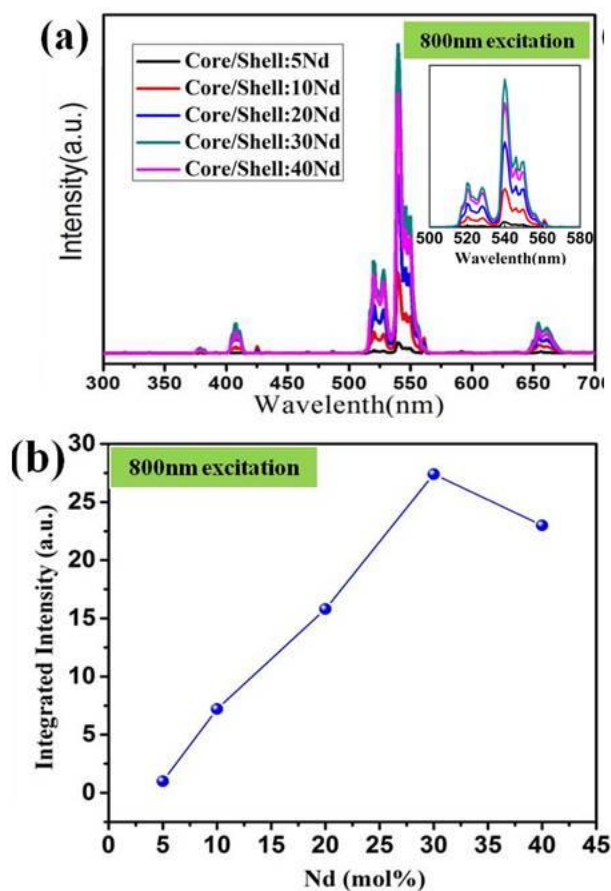

**Figure S2.** (a) Upconversion luminescence spectra of the colloidal ( $\text{NaYF}_4$ :10%Yb, 2%Er@ $\text{NaYF}_4$ : x% Nd (x = 5, 10, 20, 30, 40) core/shell nanoparticles dispersed in hexane. (b) The corresponding integrated intensity of the upconversion emission shown in a. Excitation at 800 nm with a power density of 10 W/cm<sup>2</sup>.

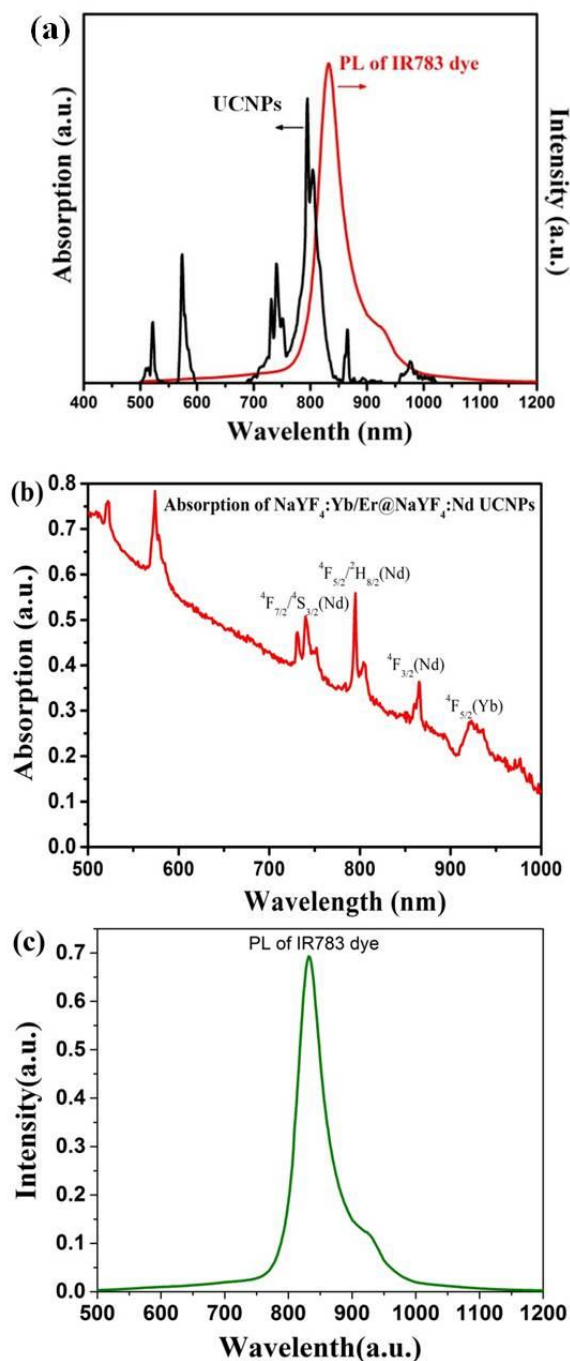

**Figure S3.** (a) Normalized absorption spectrum of the  $\text{NaYF}_4$ :10%Yb,2%Er@ $\text{NaYF}_4$ :30%Nd core/shell UCNPs and the emission spectrum of IR783 dye. The un-normalized spectrum of (b) absorption of the  $\text{NaYF}_4$ :10%Yb,2%Er@ $\text{NaYF}_4$ :30%Nd core/shell UCNPs, and (c) the emission of IR783 dye.

**Molecular weight estimate of NaYF<sub>4</sub>: 10%Yb,2%Er@NaYF<sub>4</sub>:30%Nd UCNP.** We follow the same protocol reported in our previous work to calculate the mass percentage of OA ligand coated on the UCNP,<sup>2</sup> and the mass loss was determined to be ~20% compared with the initially OA coated UCNP.

A hexagonal-phase NaYF<sub>4</sub> unit cell has the following parameters: a=b=0.596 nm, c=0.353 nm. The density is 4.23g/cm<sup>3</sup>. The average diameter (d) of sphere-like core@shell NaYF<sub>4</sub>: 10%Yb,2%Er@NaYF<sub>4</sub>:30%Nd UCNP is ~39.8 nm, and the volume of an UCNP was determined by a spherical approximation. The density of NaYF<sub>4</sub>: 10%Yb,2%Er@NaYF<sub>4</sub>:30%Nd is taken to be the same as for NaYF<sub>4</sub>, and the molecular weight of the UCNP can be calculated as follows:

The volume of a single UCNP (ligand free) is  $V_{UCNP} = \frac{4}{3} \times (\frac{d}{2})^3 \times \pi = \frac{4}{3} \times (39.8/2)^3 \times 3.14 = 3.299 \times 10^4 \text{ nm}^3$ , while the average mass of a single UCNP (ligand free) is  $m_{UCNP} = \rho_{NaYF_4} \times V_{UCNP} = 4.23 \times 10^{-21} \times 3.299 \times 10^4 = 1.395 \times 10^{-16} \text{ g}$ . Considering the mass loss of OA ligands, the average mass of initial OA-coated single UCNP is  $m_{UCNP-OA} = 1.395 \times 10^{-16} \div 80\% = 1.743 \times 10^{-16} \text{ g}$ . As a result, the “molecular weight” of initial OA-coated single UCNP is  $M_{UCNP-OA} = m_{UCNP-OA} \times N_A = 1.743 \times 10^{-16} \times 6.02 \times 10^{23} = 1.049 \times 10^8 \text{ g/mol}$ . In terms of the dye sensitized NaYF<sub>4</sub>: 10%Yb,2%Er@NaYF<sub>4</sub>:30%Nd UCNP experiment, the mass of initial OA-coated UCNP used was 8.3 mg in each sample. So the number of NaYF<sub>4</sub>: 10%Yb,2%Er@NaYF<sub>4</sub>:30%Nd UCNP in each sample is  $N_{UCNP-OA} = 0.0083 / 1.049 \times 10^8 = 0.079 \text{ nmol}$

#### **Number of IR783 dyes per UCNP.**

The number of dye molecules at the lowest concentration of IR783 dye used

$$N_{IR783} = 36.7 \times 10^{-6} \text{ g} / 749.36 \text{ g/mol} = 48.975 \text{ nmol}$$

The number of IR783 per NaYF<sub>4</sub>: 10%Yb,2%Er@NaYF<sub>4</sub>:30%Nd

$$N_{IR783/UCNP} = 48.975 \div 0.079 = 620$$

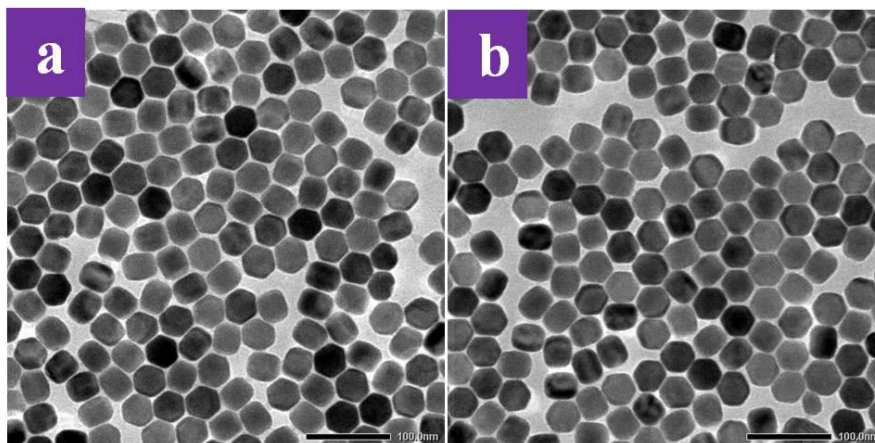

**Figure S4.** Transmission electron microscopy (TEM) images of (a)  $\text{NaYF}_4:10\%\text{Yb},2\%\text{Er}@ \text{NaYF}_4:30\%\text{Nd}$  core/shell nanoparticles (without IR783 dye treatment). (b)  $\text{NaYF}_4:10\%\text{Yb},2\%\text{Er}@ \text{NaYF}_4:30\%\text{Nd}$  core/shell nanoparticles treated with IR783 dye.

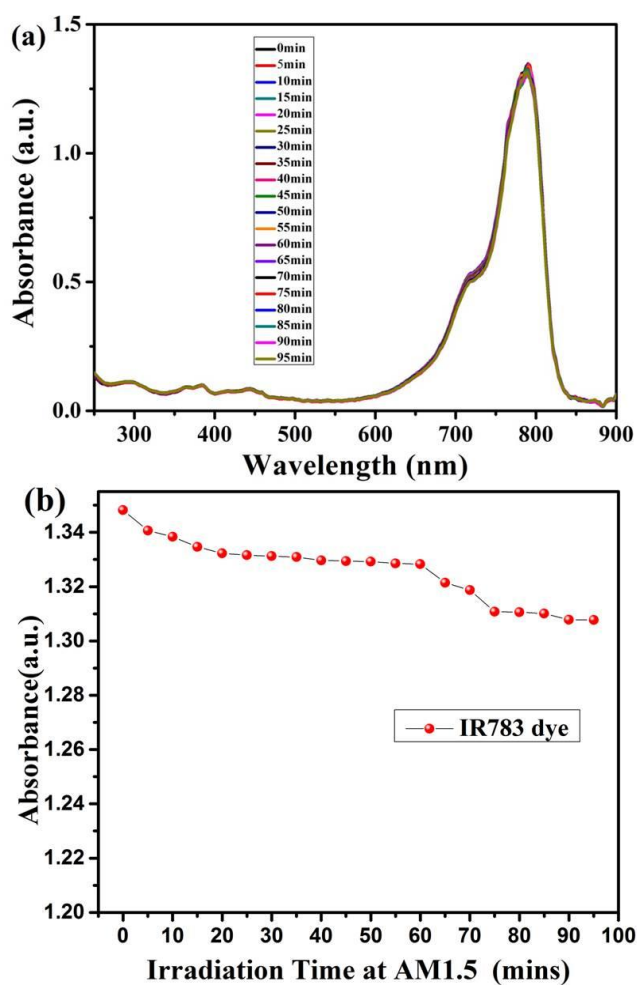



**Figure S5.** Evaluation of the photostability of IR783 dye (dissolved in DMF) under AM1.5 G simulated sunlight irradiation.

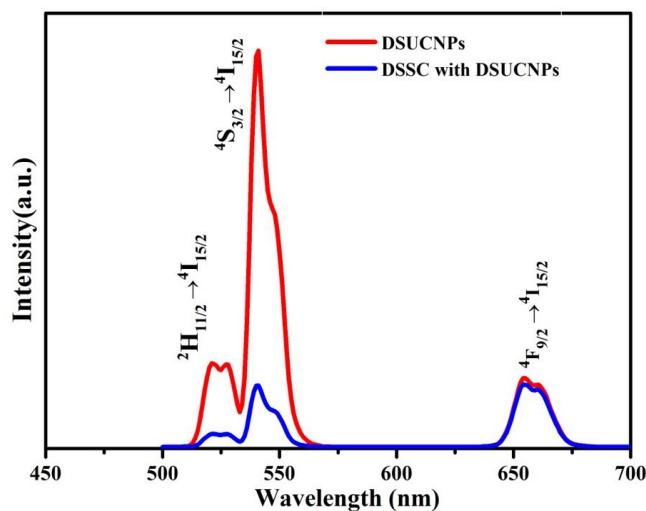

**Figure S6.** The upconversion luminescence spectra of DSUCNPs depositing on the TiO<sub>2</sub> photoanode with (blue line) and without (red line) N719 dye. The emission bands at 655 nm were normalized, which correspond to the  $^4F_{9/2} \rightarrow ^4I_{15/2}$  transition of the Er<sup>3+</sup> ions.

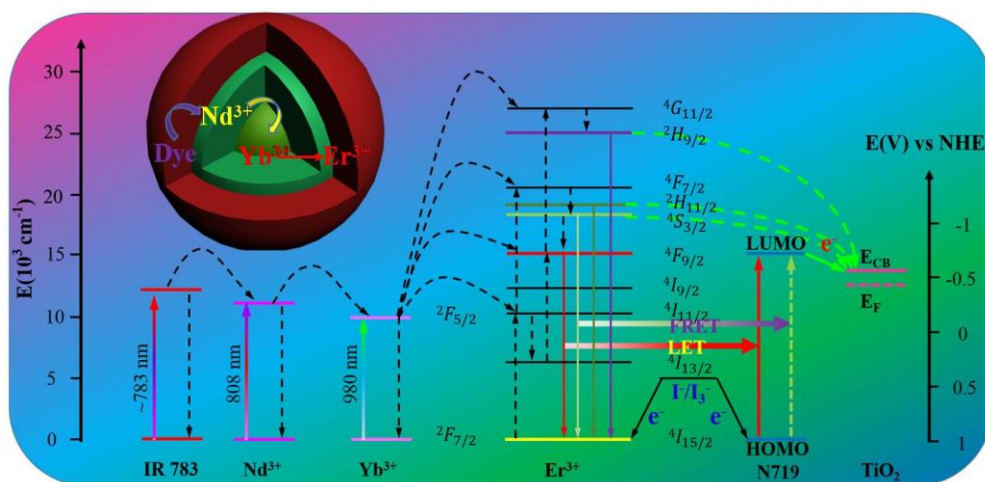

**Figure S7.** Energy level illustration of the IR783 dye sensitized-UCNPs treated DSSCs, where the NIR energy is converted into the visible spectrum energy via the internal energy transfer (ET) of IR783 dye sensitized-UCNP, and the upconverted energy from the IR783 dye sensitized-UCNP is transferred to the photosensitizer, N719 dye, via the processes of

fluorescence resonance energy transfer (FRET) and Luminescence-mediated energy transfer (LET) under solar illumination.

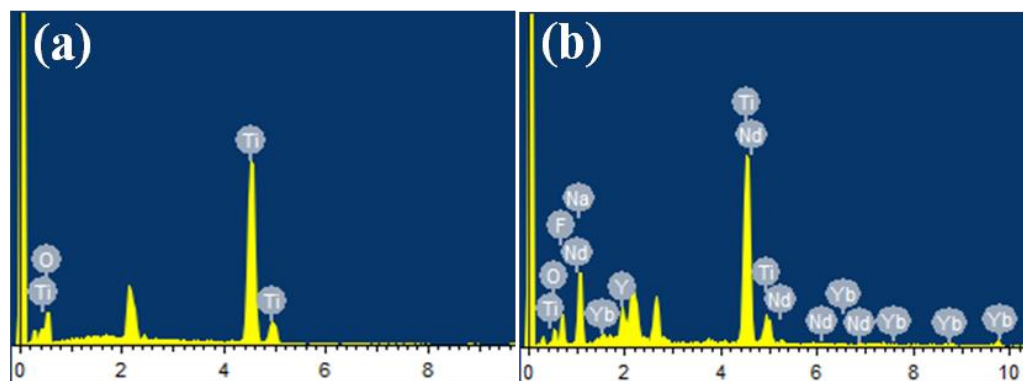

**Figure S8.** EDS spectra of: (a)  $\text{TiO}_2$  photoanode; (d)  $\text{TiO}_2$  photoanode with DSUCNPs.

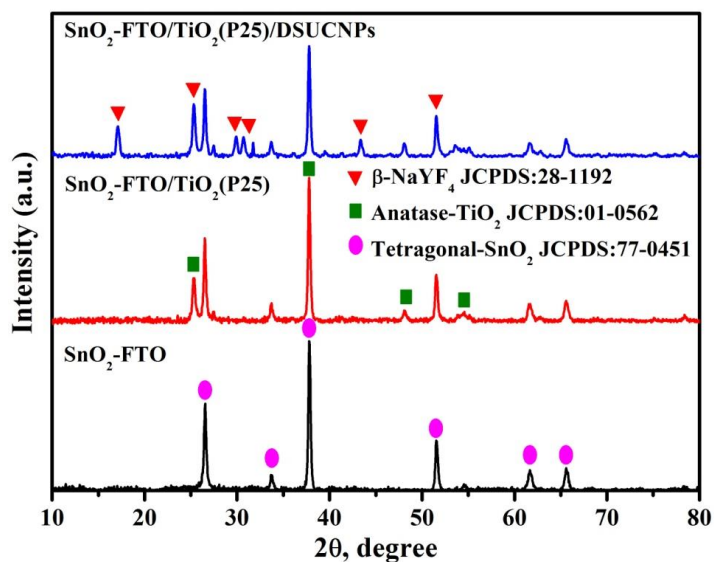

**Figure S9.** XRD patterns of FTO substrate purchased  $\text{TiO}_2$  deposited on FTO substrate and  $\text{TiO}_2$  photoanode with core/shell DSUCNPs.

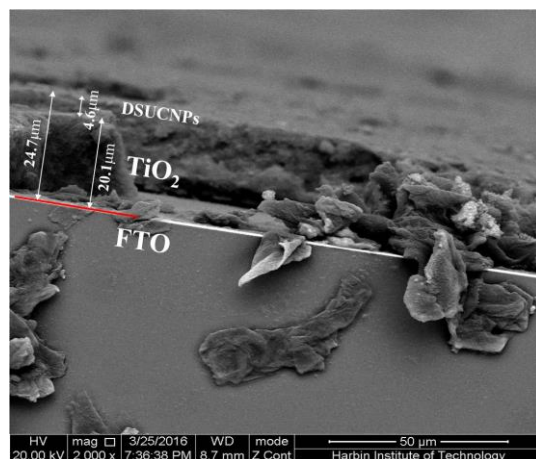

**Figure S10.** FESEM image of cross-section of DSUCNPs deposited on N719-dyed  $\text{TiO}_2$  film.

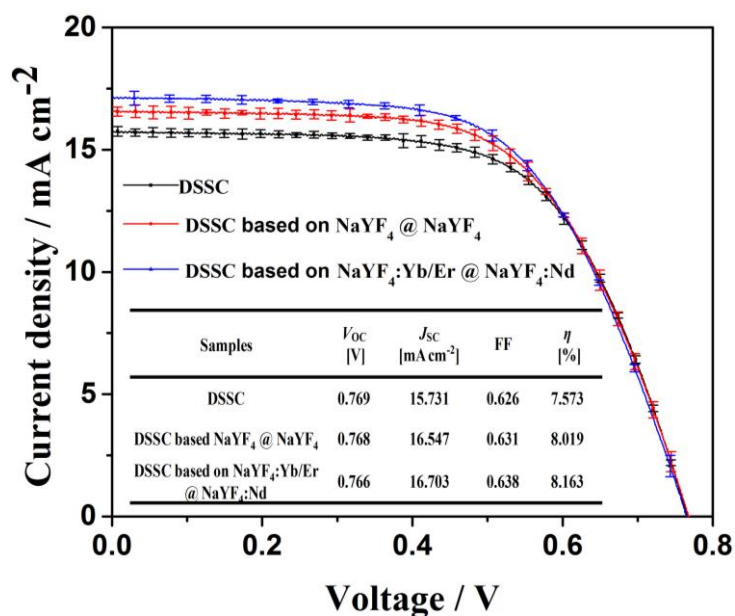

**Figure S11.** Photovoltaic performance of DSSCs, DSSCs based on  $\text{NaYF}_4 @ \text{NaYF}_4$  treated photoanodes and DSSCs based on  $\text{NaYF}_4:\text{Yb/Er} @ \text{NaYF}_4:\text{Nd}$  (UCNPs) treated photoanodes. The photovoltaic parameters measured for three times.

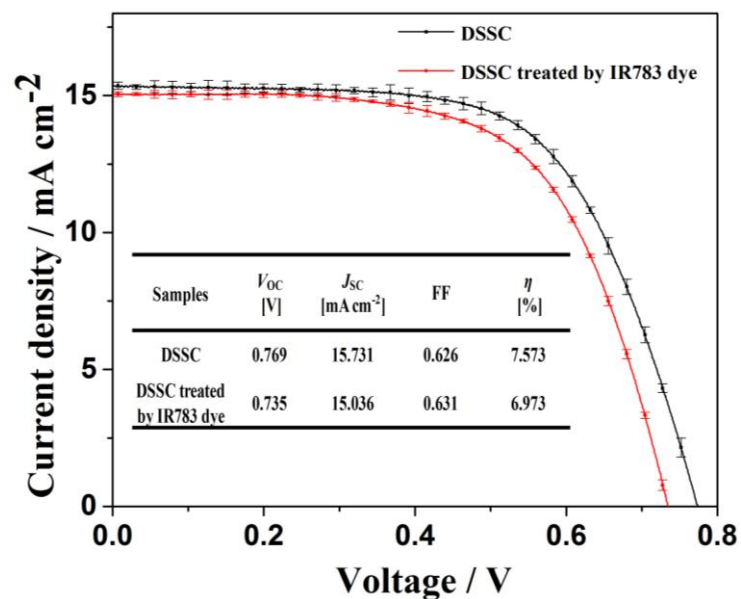

**Figure S12.** Photovoltaic performance of DSSCs and DSSCs based on only IR783-treated photoanodes. The photovoltaic parameters measured for three times.

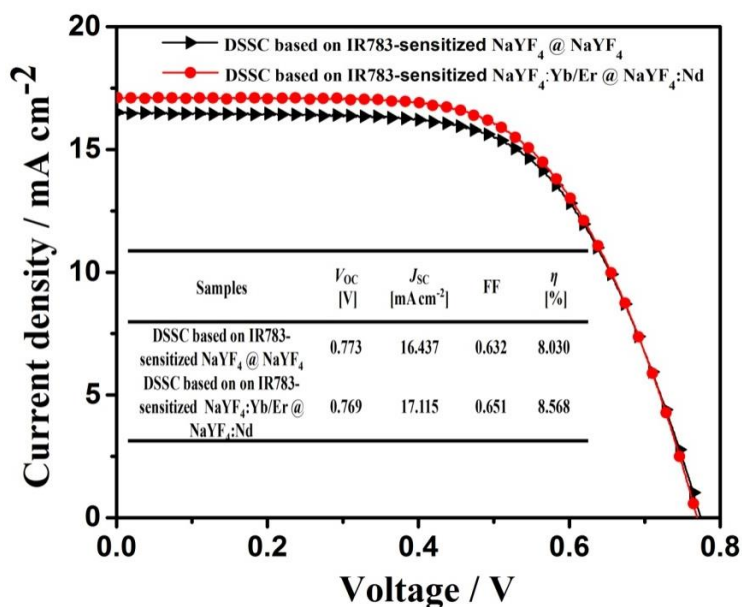

**Figure S13.** Photovoltaic performance of DSSCs based on IR783-sensitized  $\text{NaYF}_4 @ \text{NaYF}_4$  treated photoanodes and DSSCs based on IR783-sensitized  $\text{NaYF}_4:\text{Yb/Er} @ \text{NaYF}_4:\text{Nd}$  NPs (DSUCNPs) treated photoanodes.

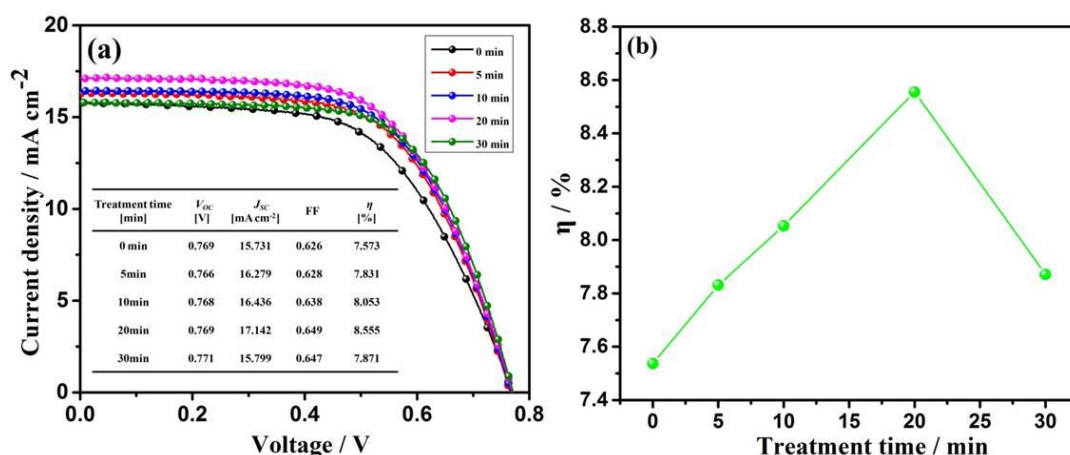

**Figure S14.** (a)  $J$ - $V$  curves of DSSC based on untreated and dyed photoanodes with various soaking times in a 40mg/ml DSUCNPs solution under AM1.5 G simulated sunlight irradiation ( $100 \text{ mWcm}^{-2}$ ); (b) The corresponding conversion efficiency of DSSC device with various soaking times in a 40mg/ml DSUCNPs solution. The efficiency was significantly enhanced due to the prolonged treatment times of IR783-sensitized core@shell NPs; the maximum efficiency reaches 8.555% at an optimal treatment time of  $\sim 20$  min. This result verifies the IR783-sensitized core@shell NPs treatment is beneficial to NIR photon harvest.

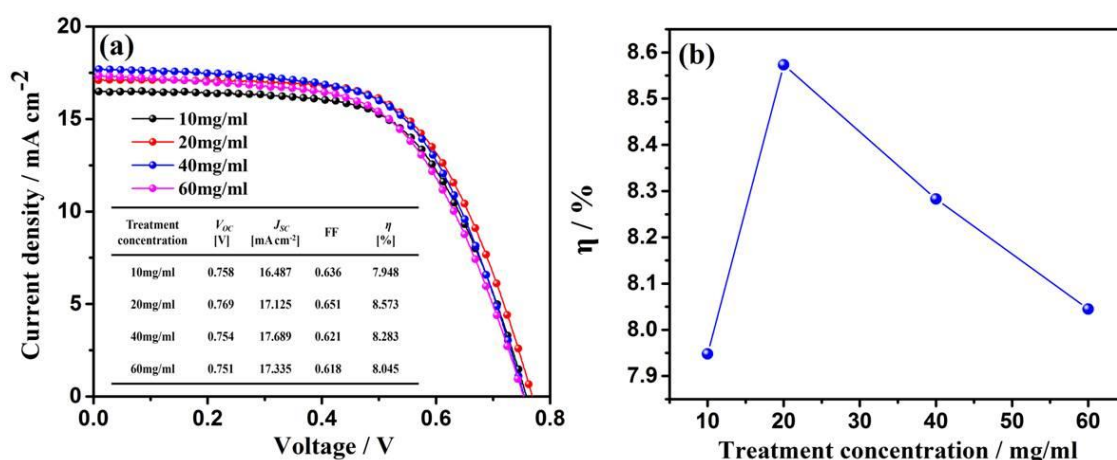

**Figure S15.** (a)  $J$ - $V$  curves of DSSC based on dyed photoanodes treated with DSUCNPs solution of various concentrations under AM1.5 G simulated sunlight irradiation ( $100 \text{ mWcm}^{-2}$ ). The soaking time was fixed in 20mins. (b) The corresponding conversion efficiency of DSSC device treated with DSUCNPs of various concentrations solution. The efficiency was significantly enhanced due to the increase of IR783-sensitized core@shell NPs; the maximum efficiency reaches 8.573% at an optimal treatment concentration of  $\sim 20$ mg/ml. This result verifies the DSUCNPs (IR783-sensitized core@shell NPs) treatment is beneficial to NIR photon harvest.

## References

S1. Dong, A. G.; Ye, X. C.; Chen, J.; Kang, Y. J.; Gordon, T.; Kikkawa, J. M.; Murray, C. B. *J. Am. Chem. Soc.*, **2011**, *133*, 998-1006.

S2 G. Y. Chen, J. A. Damasco, H. L. Qiu, W. Shao, T. Y. Ohulchanskyy, R. R. Valiev, X. Wu, G. Han, Y. Wang, C. H. Yang, H. Ågren, P. N. Prasad, *Nano Lett.*, 2015, *15*, 7400.
